# Supplementary material for: Cardiac risk stratification in cancer patients: A longitudinal patient–patient network analysis
Source: PubMed Central journal article supplement (PMC8366997; doi:10.1371/journal.pmed.1003736), 2021-08-02
Supplement: pmed.1003736.s005.pdf [file pmed.1003736.s005.pdf]

# S4 Fig

**A**

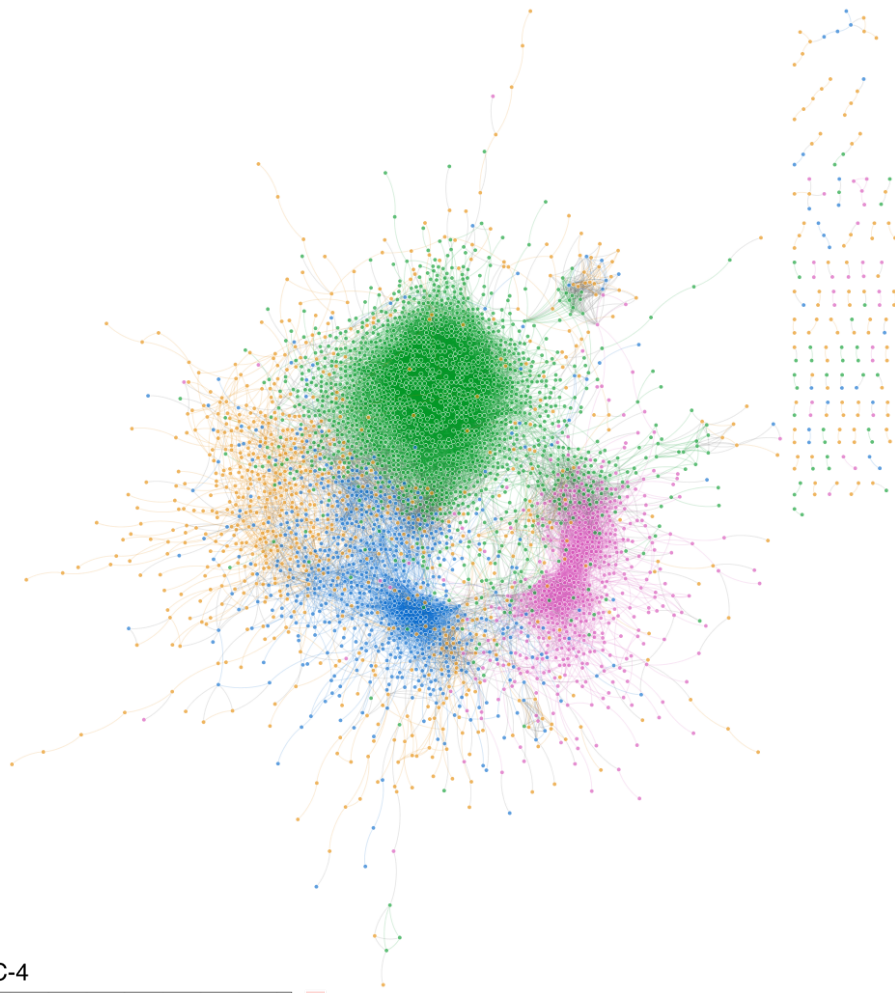

**B**

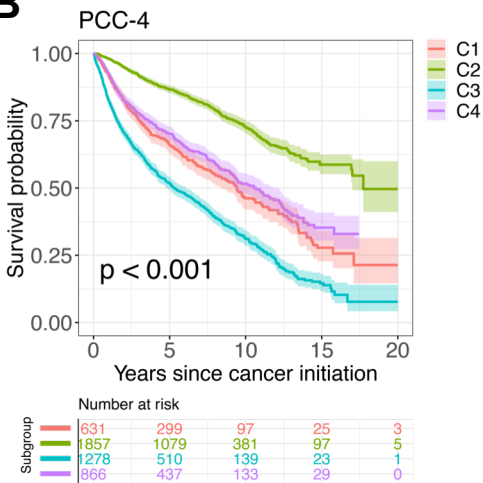

**S4 Fig. Pearson correlation coefficient (PCC) as patient similarity metric. (A)**

Patient-patient network colored by four cluster numbers. All edges have PCC < 0.65 for the patient pairs. All data preprocessing and PCC cutoff selection were same with the method cosine similarity calculation. The network was visualized using Cytoscape v 3.7.1.

**(B)** Kaplan-Meier curves to estimate the all cause survival probability in the four subgroups. The Log-rank test were used to evaluate the statistical significance.
