# Supplementary material for: Cardiac risk stratification in cancer patients: A longitudinal patient–patient network analysis
Source: PubMed Central journal article supplement (PMC8366997; doi:10.1371/journal.pmed.1003736), 2021-08-02
Supplement: pmed.1003736.s006.pdf [file pmed.1003736.s006.pdf]

# S5 Fig

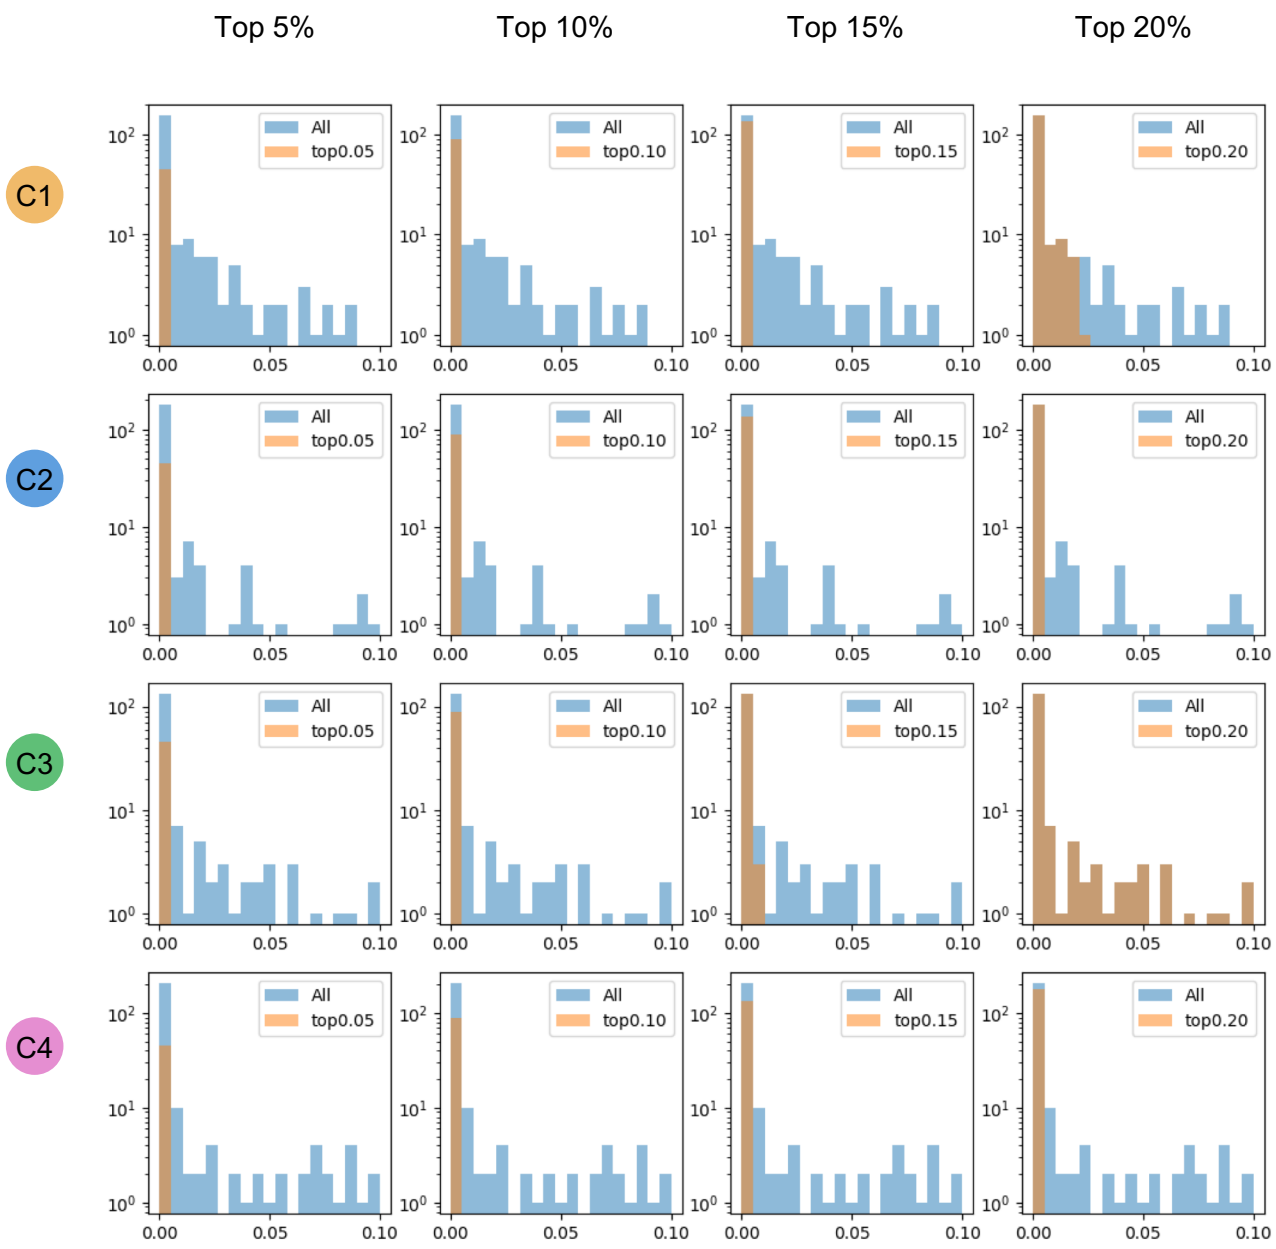

**S5 Fig. Variable network PCC cutoff selection.** 5%, 10%, 15%, and 20% were used to test the K% connections with the highest PCC for the construction of the network
